# Supplementary material for: Improved herbicide discovery using physico-chemical rules refined by antimalarial library screening
Source: PubMed Central journal article supplement (PMC8695207; doi:10.1039/d1ra00914a), 2021-02-23
Supplement: RA-011-D1RA00914A-s001.pdf [file RA-011-D1RA00914A-s001.pdf]

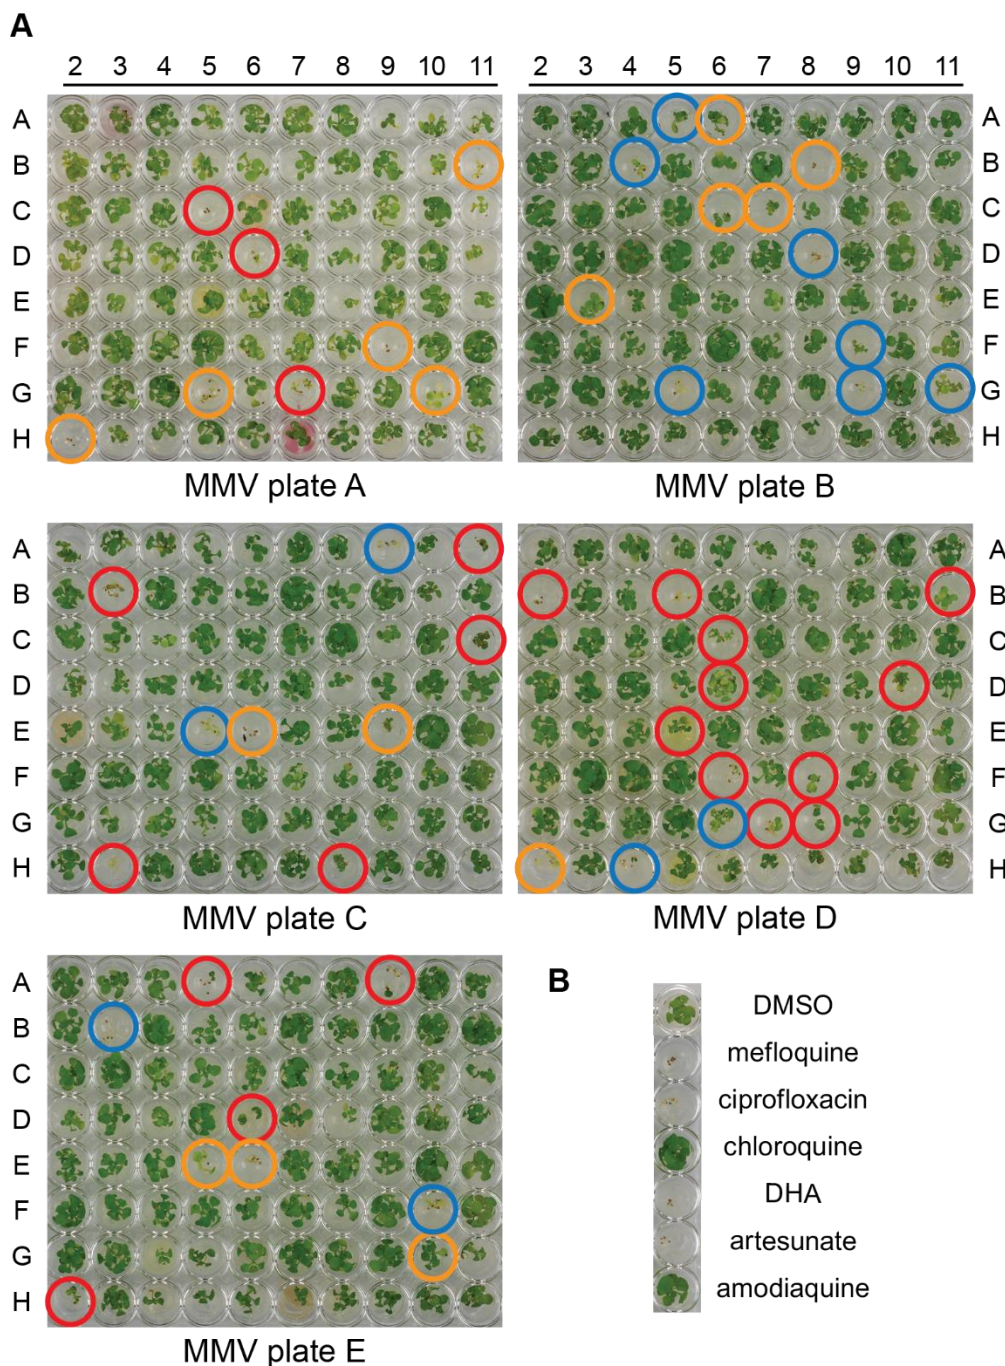

**Supporting Figure 1 | Agar plate herbicidal activity of antimalarial compounds.** (A) Activity of the MMV400 against *A. thaliana* at 80  $\mu$ M. Orange circles indicate the compounds active against soil-grown plants, red circles indicate plate-only active compounds, blue circles denote plate-active compounds that were not tested for activity against soil-grown plants; (B) Positive controls at 80  $\mu$ M, DHA – dihydroartemisinin, DMSO was used as a negative control at 1% (vol) concentration.
